# Supplementary material for: Protein Intake and Physical Activity Levels as Determinants of Sarcopenia Risk in Community-Dwelling Older Adults
Source: MDPI journal article supplement (doi:10.3390/nu16091380), 2024-05-02
Supplement: s1 [file s1]

**Supplementary Figure S1. CONSORT Participant Flow Diagram**

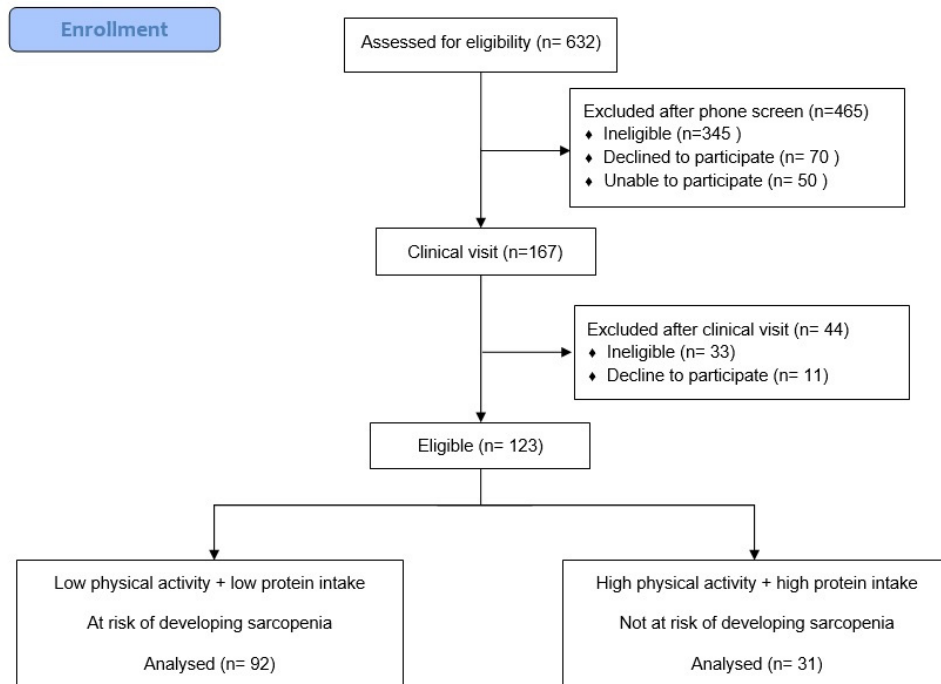

**Supplementary Table S1.** Body composition, strength and physical function in participants who meet functional criteria of sarcopenia versus high risk participants

|                                      | <b>Functional<br/>Sarcopenia (n=17)</b> | <b>Other High Risk<br/>(n=75)</b> | <b>p-values</b>  |
|--------------------------------------|-----------------------------------------|-----------------------------------|------------------|
| Age                                  | 72.2 (68.8-79.3)                        | 72.3 (68.6-75.3)                  | 0.530            |
| Female n (%)                         | 14 (82%)                                | 57 (80%)                          | 0.753            |
| <b><i>Body Composition</i></b>       |                                         |                                   |                  |
| Weight (kg)                          | 80.7 (12.1)                             | 82.2 (14.9)                       | 0.699            |
| BMI (kg·m <sup>2</sup> )             | 31.3 (5.1)                              | 30.2 (4.7)                        | 0.370            |
| FFM (kg)                             | 44.79 (42.33-46.88)                     | 44.43 (41.48-52.00)               | 0.669            |
| FFMI (kg·m <sup>2</sup> )            | 17.27 (16.46-18.83)                     | 16.77 (15.88-18.86)               | 0.597            |
| Lean mass (%)                        | 50 (10)                                 | 60 (10)                           | 0.350            |
| ASMM (kg)                            | 18.90 (17.23-19.88)                     | 18.43 (16.99-22.15)               | 0.536            |
| ASMMI (kg·m <sup>2</sup> )           | 7.12 (6.70-8.15)                        | 7.07 (6.46-8.03)                  | 0.829            |
| Fat mass (kg)                        | 37.18 (26.33-45.17)                     | 33.82 (27.65-41.07)               | 0.721            |
| Fat mass index (kg·m <sup>2</sup> )  | 15.12 (10.52-17.26)                     | 12.41 (10.37-15.23)               | 0.347            |
| Fat (%)*                             | 50 (40-50)                              | 40 (40-50)                        | 0.241            |
| VAT mass (kg)                        | 1.12 (0.90-1.51)                        | 1.36 (0.99-1.93)                  | 0.263            |
| Total body bone mineral content (kg) | 2.10 (2.03-2.58)                        | 2.31 (2.07-2.77)                  | 0.170            |
| Spine BMD g/cm <sup>2</sup>          | 1.19 (0.24)                             | 1.21 (0.20)                       | 0.770            |
| Spine BMD T-scores,                  | 0.07 (1.95)                             | 0.16 (1.62)                       | 0.832            |
| Total hip BMD g/cm <sup>2</sup>      | 0.91 (0.19)                             | 0.95 (0.12)                       | 0.205            |
| Total hip BMD T-scores               | -0.90 (1.52)                            | -0.55 (0.92)                      | 0.226            |
| <b><i>Strength</i></b>               |                                         |                                   |                  |
| Five chair stand test (s)            | 12.3 (10.0-17.2)                        | 11.0 (9.4-13.2)                   | 0.099            |
| Thirty second sit-to-stand (stands)* | 10.9 (2.7)                              | 13.1 (2.8)                        | <b>0.006</b>     |
| Grip strength, total (kg)            | 25.0 (20.0-28.0)                        | 26.0 (23.0-30.0)                  | 0.113            |
| Shoulder adduction strength (kg)     | 8.0 ( 3.0-10.0)                         | 12.0 (7.5-16.5)                   | <b>0.002</b>     |
| Shoulder abduction strength (kg)     | 4.5 (3.0-7.5)                           | 7.5 (4.0-11.5)                    | <b>0.049</b>     |
| <b><i>Physical Function</i></b>      |                                         |                                   |                  |
| SPPB score (total)                   | 8.0 (8.0-11.0)                          | 11.0 (10.0-12.0)                  | <b>&lt;0.001</b> |
| Gait speed (m·s <sup>-1</sup> )      | 0.8 (0.8-0.8)                           | 1.0 (1.0-1.2)                     | <b>&lt;0.001</b> |
| TUG (s)                              | 7.9 (7.0-11.0)                          | 7.0 (6.6-7.5)                     | <b>0.006</b>     |

**Supplementary Table S2.** Macronutrient dietary intake in participants who meet functional criteria of sarcopenia versus high risk participants

|                                                  | Functional Sarcopenia<br>(n=17) | Other High Risk (n=75) | <i>p-values</i> | <i>Energy- adjusted<br/>p-values</i> |
|--------------------------------------------------|---------------------------------|------------------------|-----------------|--------------------------------------|
| <i>Macronutrients</i>                            |                                 |                        |                 |                                      |
| Energy (kJ·day <sup>-1</sup> )                   | 5992 (1265)                     | 6257 (1477)            | 0.506           |                                      |
| Energy (kJ·kg <sup>-1</sup> ·day <sup>-1</sup> ) | 76.8 (17.2)                     | 77.6 (18.9)            | 0.872           |                                      |
| Protein (g·day <sup>-1</sup> )                   | 65.1 (13.7)                     | 64.5 (12.7)            | 0.867           | 0.321                                |
| Protein (g·kg <sup>-1</sup> ·day <sup>-1</sup> ) | 0.8 (0.7-0.9)                   | 0.8 (0.7-0.9)          | 0.552           | 0.238                                |
| Carbohydrate (g·day <sup>-1</sup> )              | 138.9 (132.7-163.7)             | 150.5 (121.3-184.4)    | 0.359           | 0.460                                |
| Fibre (g·day <sup>-1</sup> )                     | 18.6 (17.5-27.7)                | 19.7 (15.0-25.3)       | 0.925           | 0.546                                |
| Fat (g·day <sup>-1</sup> )*                      | 62.5 (42.8-67.9)                | 53.7 (44.1-69.1)       | 0.942           | 0.564                                |
| SFA (g·day <sup>-1</sup> )                       | 22.0 (8.3)                      | 22.0 (8.4)             | 0.989           | 0.571                                |
| MUFA (g·day <sup>-1</sup> )                      | 20.8 (14.5-27.9)                | 20.2 (16.1-26.0)       | 0.859           | 0.334                                |
| PUFA (g·day <sup>-1</sup> )                      | 7.5 (6.0-9.0)                   | 8.0 (6.4-10.2)         | 0.307           | 0.410                                |

**Supplementary Table S3.** Physical activity levels in participants who meet functional criteria of sarcopenia versus high risk participants

|                                                      | Functional<br>Sarcopenia (n=17) | Other High Risk<br>(n=75) | <i>p-values</i> |
|------------------------------------------------------|---------------------------------|---------------------------|-----------------|
| <i>Activity Dimension Indices</i>                    |                                 |                           |                 |
| Vigorous Activity index (units·month <sup>-1</sup> ) | 0.0 (0.0-10.0)                  | 5.0 (0.0-15.0)            | 0.555           |
| Leisure walking index (units·month <sup>-1</sup> )   | 8.0 (4.0-24.0)                  | 16.0 (8.0-24.0)           | 0.099           |
| Moving index (units·month <sup>-1</sup> )            | 7.9 (3.0)                       | 8.6 (2.7)                 | 0.378           |
| Standing index (units·month <sup>-1</sup> )          | 4.0 (2.0-4.0)                   | 4.0 (2.0-4.0)             | 0.854           |
| Sitting index (units·month <sup>-1</sup> )           | 2.4 (0.6)                       | 2.3 (0.8)                 | 0.875           |
| Total activity dimension indices                     | 33.2 (18.4)                     | 37.9 (15.4)               | 0.278           |
| <i>Activities</i>                                    |                                 |                           |                 |
| Brisk walking (hours·week <sup>-1</sup> )            | 0.0 (0.0-0.3)                   | 0.0 (0.0-2.0)             | 0.108           |
| Stretch/yoga/tai chi (hours·week <sup>-1</sup> )     | 0.0 (0.0-1.0)                   | 0.0 (0.0-1.0)             | 0.845           |
| Aerobics (hours·week <sup>-1</sup> )                 | 0.0 (0.0-0.0)                   | 0.0 (0.0-0.0)             | 0.498           |
| Cycling (hours·week <sup>-1</sup> )                  | 0.0 (0.0-0.0)                   | 0.0 (0.0-0.0)             | 0.469           |
| Lap swimming (hours·week <sup>-1</sup> )             | 0.0 (0.0-0.0)                   | 0.0 (0.0-0.0)             | 0.404           |
| Strength exercise (hours·week <sup>-1</sup> )        | 0.0 (0.0-0.0)                   | 0.0 (0.0-0.0)             | 0.318           |
| Leisurely walking (hours·week <sup>-1</sup> )        | 0.5 (0.0-1.8)                   | 1.0 (0.0-2.0)             | 0.550           |

**Supplementary Table S4.** Quality of life in participants who meet functional criteria of sarcopenia versus high risk participants

|                                              | <b>Functional<br/>Sarcopenia (n=17)</b> | <b>Other High Risk<br/>(n=75)</b> | <i>p-values</i> |
|----------------------------------------------|-----------------------------------------|-----------------------------------|-----------------|
| Physical function                            | 70 (40-80)                              | 85 (75-95)                        | <b>0.002</b>    |
| Role limitations due to physical<br>function | 75 (50-100)                             | 100 (75-100)                      | <b>0.035</b>    |
| Pain                                         |                                         |                                   |                 |
| General health                               | 72 (57-82)                              | 82 (67-87)                        | <b>0.046</b>    |
| Energy                                       | 60 (55-65)                              | 70 (60-80)                        | <b>0.005</b>    |
| Social function                              | 88 (75-100)                             | 100 (88-100)                      | 0.011           |
| Role limitations due to emotional<br>health  | 100 (33-100)                            | 100 (100-100)                     | 0.255           |
| Emotional well-being                         | 80 (64-88)                              | 84 (76-88)                        | 0.242           |
| Physical component score                     | 44 (35-49)                              | 51 (47-55)                        | <b>0.004</b>    |
| Mental component score                       | 53 (45-58)                              | 56 (52-58)                        | 0.222           |

**Supplementary Table S5.** Quality of life SF-36 sub-domains and overall component scores by group

|                                           | <b>High risk (n=92)</b> | <b>Low risk (n=31)</b> | <i>p-values</i>  |
|-------------------------------------------|-------------------------|------------------------|------------------|
| Physical function                         | 85 (70-95)              | 95 (90-100)            | <b>&lt;0.001</b> |
| Role limitations due to physical function | 100 (75-100)            | 100 (100-100)          | <b>0.034</b>     |
| Pain                                      | 74 (62-100)             | 74 (72-84)             | 0.815            |
| General health                            | 81 (67-87)              | 85 (77-92)             | <b>0.006</b>     |
| Energy                                    | 68 (60-80)              | 80 (70-85)             | <b>0.011</b>     |
| Social function                           | 100 (75-100)            | 100 (88-100)           | 0.469            |
| Role limitations due to emotional health  | 100 (100-100)           | 100 (100-100)          | 0.054            |
| Emotional well-being                      | 84 (76-88)              | 84 (80-92)             | 0.240            |
| Physical component score                  | 50 (44-55)              | 54 (50-57)             | <b>0.013</b>     |
| Mental component score                    | 55 (51-58)              | 56 (53-58)             | 0.378            |

Data presented as median (IQR).
